# Supplementary material for: Synergism of metabolic modulators Bet-CA and LDCA: a rational combinatorial approach to selectively combat cancer associated hallmark traits
Source: Royal Society of Chemistry journal article supplement (doi:10.1039/c6ra14366k), 2016-01-01
Supplement: c6ra14366k1.pdf [file c6ra14366k1.pdf]

## **Electronic Supporting Information**

### **Synergism of metabolic modulators Bet-CA and LDCA: A rational combinatorial approach to selectively combat cancer associated hallmark traits**

Monisankar Ghosh<sup>§</sup>, Suchandrima Saha<sup>§</sup> and Samir Kumar Dutta<sup>\*</sup>

*Department of Drug Development Diagnostics and Biotechnology, CSIR- Indian Institute of Chemical Biology (CSIR-IICB), 4, Raja S.C. Mullick Road, Kolkata-700032, India.*

<sup>§</sup>*M.G. and S.S contributed equally to this work*

*Correspondence to S.K. Dutta ([samirkdutta@iicb.res.in](mailto:samirkdutta@iicb.res.in), [somir\\_india@yahoo.com](mailto:somir_india@yahoo.com))*

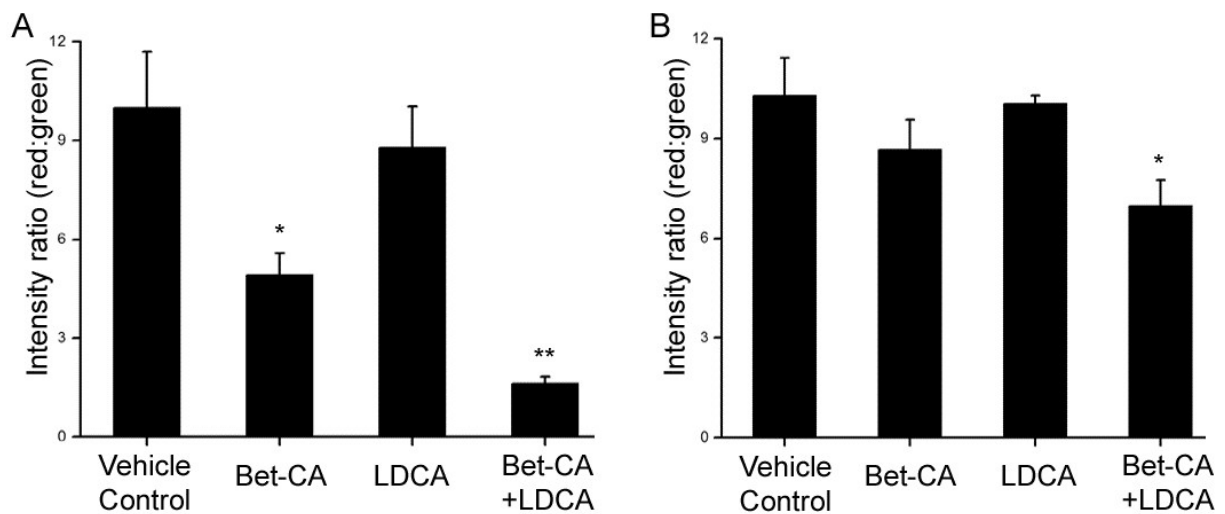

Fig. S1. Combination treatment selectively alters mitochondrial hyperpolarization. Graph demonstrates comparative quantification of red: green fluorescence intensity ratio in combination of 10  $\mu$ M Bet-CA and 20  $\mu$ M LDCA treated (A) B16-F10 and (B) WI-38 cells after 16 h. \*\* $p < 0.01$ , \* $p < 0.05$ .

In all panels error bars represent mean  $\pm$  SD.

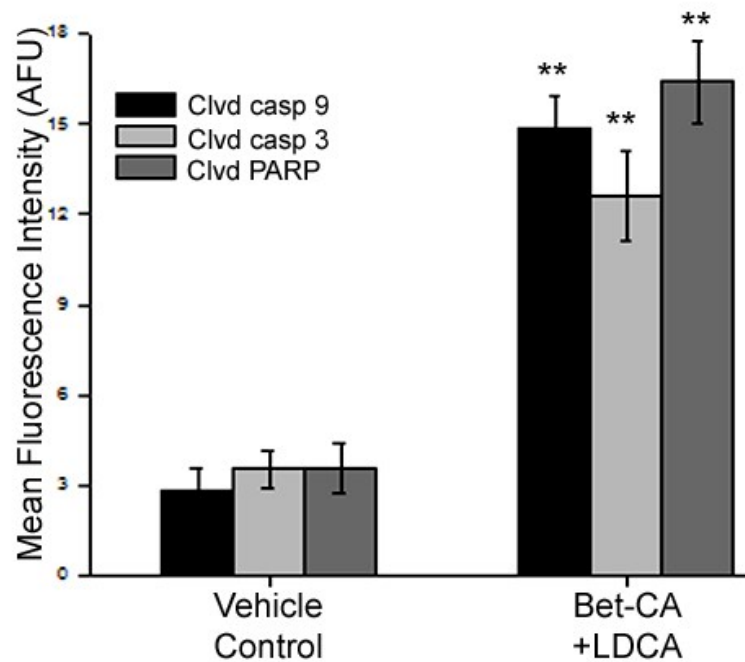

Fig. S2. Combination treatment elicits caspase mediated apoptosis. Graph represents quantitative determination of cleaved casp-9/3 and PARP levels in vehicle control and 10  $\mu$ M Bet-CA and 20  $\mu$ M LDCA combination treated sets. \*\* $p < 0.01$ .

Error bars represent mean  $\pm$  SD.

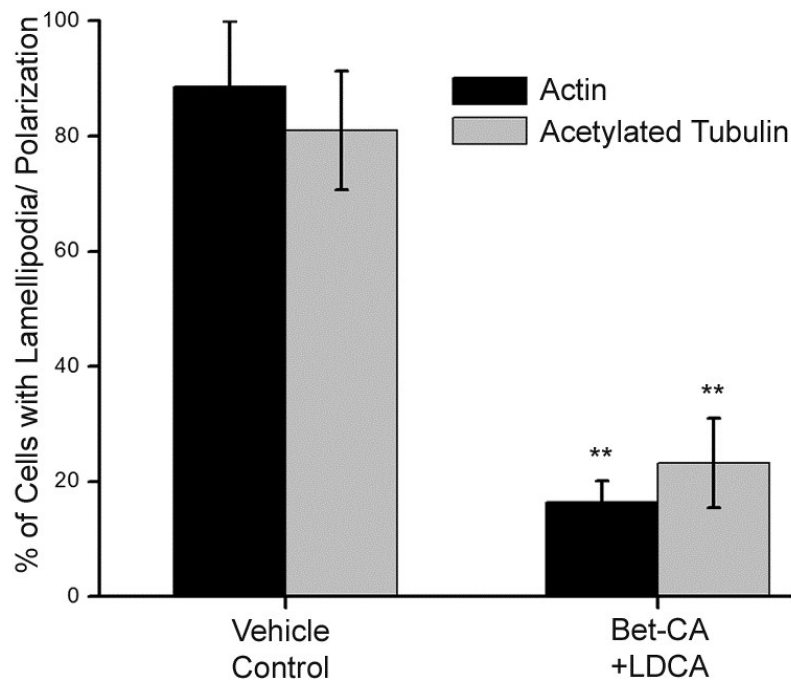

Fig. S3. Bet-CA and LDCA treatment alters cytoskeletal remodeling. Cells with actin ruffles and polarization have been quantified for vehicle control and 10  $\mu$ M Bet-CA and 20  $\mu$ M LDCA combination treated sets, analyzed and graphically represented. \*\* $p < 0.01$ . Error bars represent mean  $\pm$  SD.

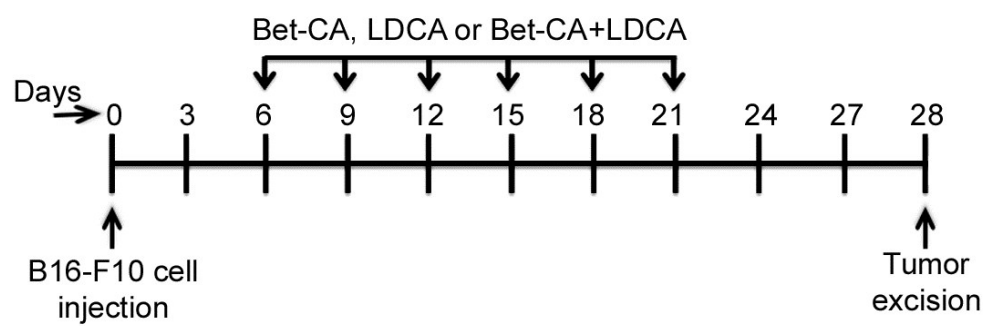

Fig. S4. Outline of the dosing schedule used in B16-F10 mouse syngeneic melanoma model.

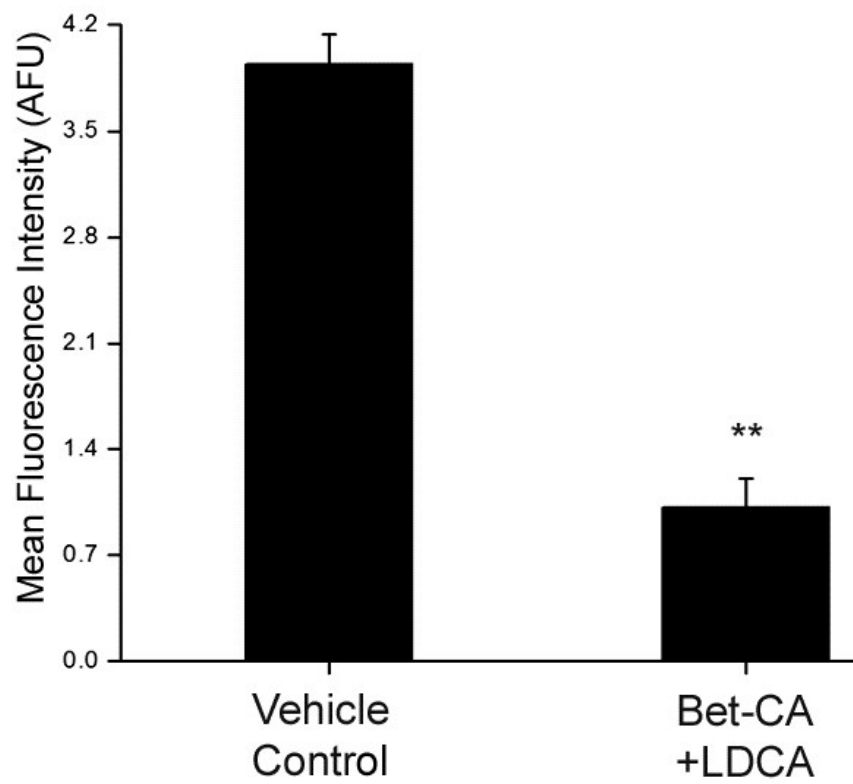

Fig. S5. Effect of 1 mg/kg Bet-CA and 2 mg/kg LDCA combination treatment on tumor associated neo-vasculature formation. Graph represents quantification of lectin signal intensity.

\*\*p < 0.01.

Error bars represent mean  $\pm$  SD.

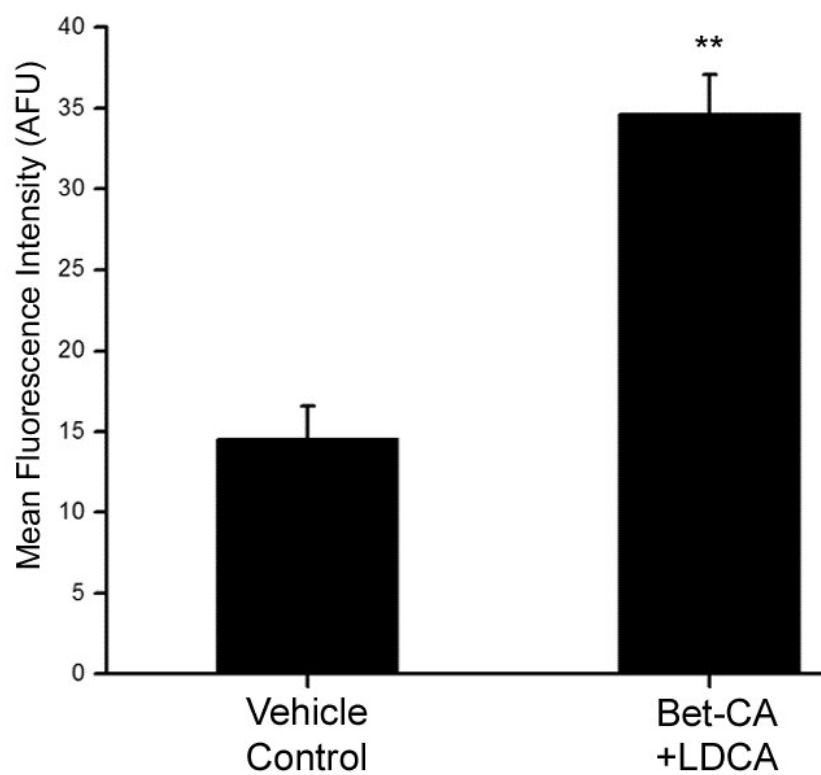

Fig. S6. Graph represents quantitative estimation of ROS generation following 1 mg/kg Bet-CA and 2 mg/kg LDCA combination treatment *in vivo*. \*\*p < 0.01.

Error bars represent mean  $\pm$  SD.
